# Supplementary material
Source: PubMed Central journal article supplement (PMC7234913)
Supplement: NIHMS1574272-supplement-1.pdf [file NIHMS1574272-supplement-1.pdf]

## Supplementary Material

### Multimorbidity in Medicare beneficiaries: Performance of an ICD-coded multimorbidity-weighted index

Melissa Y. Wei, MD, MPH, MS<sup>1,2</sup>, David Ratz, MS<sup>3</sup>, Kenneth J. Mukamal, MD, MPH, MA<sup>4</sup>

<sup>1</sup> Division of General Medicine, University of Michigan, 2800 Plymouth Rd, Building 16, Room 430W, Ann Arbor, Michigan 48109, USA

<sup>2</sup> Institute for Healthcare Policy and Innovation, University of Michigan, 2800 Plymouth Rd, Building 16, Room 430W, Ann Arbor, Michigan 48109, USA

<sup>3</sup> Center for Clinical Management Research, VA Ann Arbor Healthcare System, Ann Arbor, MI, USA

<sup>4</sup> Division of General Medicine, Beth Israel Deaconess Medical Center and Harvard Medical School, 1309 Beacon St., 2<sup>nd</sup> floor, Brookline, Massachusetts 02446, USA

| TABLE OF CONTENTS                                                                                                                                       | Page |
|---------------------------------------------------------------------------------------------------------------------------------------------------------|------|
| Title page                                                                                                                                              | 1    |
| <b>Supplementary Appendix S1.</b> How to calculate the ICD-coded multimorbidity-weighted index (MWI-ICD)                                                | 2    |
| <b>Supplementary Table S1.</b> Multimorbidity-weighted index weightings and ICD-9-CM codes for chronic diseases and conditions.                         | 3    |
| <b>Supplementary Table S2.</b> Prevalence of chronic conditions based on self-report versus ICD-coded conditions at baseline in 2006.                   | 7    |
| <b>Supplementary Table S3.</b> Hazard ratios for mortality after 10-year follow-up, 2006-2016, N=9,923.                                                 | 8    |
| <b>Supplementary Table S4.</b> Short Form-36 physical functioning by standardized metrics after 8-years of follow-up from baseline, 2006-2014.          | 10   |
| <b>Supplementary Figure S1.</b> Lorenz curves for Gini index values for measures of multimorbidity at baseline, 2006.                                   | 12   |
| <b>Supplementary Figure S2.</b> The distribution of the ICD-coded multimorbidity-weighted index (MWI-ICD) most closely follows an exponential function. | 13   |
| <b>Supplementary Appendix S2.</b> SAS macro for ICD-coded multimorbidity-weighted index (MWI-ICD).                                                      | 14   |

**Supplementary Appendix S1.** How to calculate the ICD-coded multimorbidity-weighted index (MWI-ICD).

1. Assess for the presence of physician-diagnosed chronic diseases and conditions. Locate the corresponding ICD-9-CM codes for each condition using Supplementary Table S1.
2. Look up the multimorbidity-weighted index weightings for each chronic disease or condition using Supplementary Table S1. For chronic diseases and conditions not specifically listed, use the weighting “other diagnosis” in the first row.
3. Add up all the weighted chronic diseases and conditions to create the ICD-coded multimorbidity-weighted index.

Example:

1. Participant A has chronic conditions  $X_1$ ,  $X_2$  and  $X_3$  identified through their respective ICD-9 codes.
2. Using Supplemental Table 1, the MWI disease weightings for the ICD-9 codes corresponding to conditions  $X_1$ ,  $X_2$  and  $X_3$  are  $\beta_{X_1}$ ,  $\beta_{X_2}$ , and  $\beta_{X_3}$ , respectively.
3. Person A has an ICD-coded multimorbidity-weighted index =  $\beta_{X_1} + \beta_{X_2} + \beta_{X_3}$ .

Reference on the development and internal validation of the multimorbidity-weighted index:

Wei MY, Kawachi I, Okereke OI, Mukamal KJ. Diverse cumulative impact of chronic diseases on physical health-related quality of life: implications for a measure of multimorbidity. *American Journal of Epidemiology*. 2016;184(5):357-365.

Reference on the development and construct validity of the ICD-coded multimorbidity-weighted index:

Wei MY, Ratz D, Mukamal KJ. Multimorbidity in Medicare beneficiaries: Performance of an ICD-coded multimorbidity-weighted index. *Journal of the American Geriatrics Society*.

**Supplementary Table S1. Multimorbidity-weighted index weightings and ICD-9-CM codes for chronic diseases and conditions.**

| Chronic disease or condition                             | Multimorbidity-weighted index weighting | ICD-9-CM codes                                                                                                                             | Chronic disease or condition           | Multimorbidity-weighted index weighting | ICD-9-CM codes                                                                                                       |
|----------------------------------------------------------|-----------------------------------------|--------------------------------------------------------------------------------------------------------------------------------------------|----------------------------------------|-----------------------------------------|----------------------------------------------------------------------------------------------------------------------|
| <b>Cardiovascular</b>                                    |                                         |                                                                                                                                            | Valvular heart disease                 | -0.416                                  | 394.0X,<br>394.2X,<br>396.XX,<br>397.0X,<br>424.1X-<br>424.3X,<br>429.71,<br>746.3X-<br>746.6X,<br>V42.2X,<br>V43.3X |
| Angina                                                   | -2.20                                   | 413.XX                                                                                                                                     |                                        |                                         |                                                                                                                      |
| Aneurysm/dissection of chest area                        | -1.96                                   | 441.XX                                                                                                                                     |                                        |                                         |                                                                                                                      |
| Atrial fibrillation                                      | -1.33                                   | 427.31                                                                                                                                     |                                        |                                         |                                                                                                                      |
| Automated Implantable Cardioverter Defibrillator (AICD)  | -1.57                                   | 37.94-<br>37.98,<br>V45.02,<br>V53.32,<br>996.04                                                                                           |                                        |                                         |                                                                                                                      |
| Congestive heart failure <sup>1</sup>                    | -4.77                                   | 425.11-<br>425.9X,<br>428.XX,<br>398.91,<br>402.01,<br>402.11,<br>402.91,<br>404.01,<br>404.03,<br>404.11,<br>404.13,<br>404.91,<br>404.93 | <b>Endocrine</b>                       |                                         |                                                                                                                      |
|                                                          |                                         |                                                                                                                                            | Diabetes mellitus                      | -2.67                                   | 249.XX,<br>250.XX,<br>V58.67,<br>V53.91,<br>E93.23                                                                   |
|                                                          |                                         |                                                                                                                                            | Elevated cholesterol<br>Hyperlipidemia | -0.343                                  | 272.0X,<br>272.2X,<br>272.4X,<br>272.6X,<br>272.7X                                                                   |
|                                                          |                                         |                                                                                                                                            | Hyperthyroidism <sup>2</sup>           | -0.149                                  | 242.01,<br>242.11,<br>242.21,<br>242.31,<br>242.41,<br>242.81,<br>242.91                                             |
| Coronary artery bypass graft surgery                     | -0.724                                  | 036.1X                                                                                                                                     |                                        |                                         |                                                                                                                      |
| High blood pressure <sup>1</sup>                         | -1.53                                   | 401.XX,<br>402.00,<br>402.10,<br>402.90,<br>403.10-<br>403.91,<br>405.XX                                                                   | Hypertriglyceridemia                   | -0.692                                  | 272.1X,<br>272.3X                                                                                                    |
|                                                          |                                         |                                                                                                                                            | Hypothyroidism                         | -0.808                                  | 243.XX,<br>244.XX                                                                                                    |
| Mitral valve prolapse                                    | -0.033                                  | 394.9X,<br>424.0X                                                                                                                          | Thyroid nodule/goiter <sup>2</sup>     | 0                                       | 240.XX-<br>242.41,<br>246.1X                                                                                         |
| Myocardial infarction                                    | -1.73                                   | 410.XX,<br>411.0X,<br>411.1X,<br>412.XX,<br>429.79                                                                                         | <b>Gastrointestinal</b>                |                                         |                                                                                                                      |
|                                                          |                                         |                                                                                                                                            | Barrett's esophagus                    | -0.284                                  | 530.85                                                                                                               |
| Peripheral artery disease/atherosclerosis of extremities | -3.25                                   | 443.81-<br>443.9X,<br>447.1X,<br>V43.4X,<br>440.1X-<br>440.9X                                                                              |                                        |                                         |                                                                                                                      |

| Chronic disease or condition                                           | Multimorbidity-weighted index weighting | ICD-9-CM codes                                                                                                                                        | Chronic disease or condition                                                                                            | Multimorbidity-weighted index weighting | ICD-9-CM codes                                                           |
|------------------------------------------------------------------------|-----------------------------------------|-------------------------------------------------------------------------------------------------------------------------------------------------------|-------------------------------------------------------------------------------------------------------------------------|-----------------------------------------|--------------------------------------------------------------------------|
| Chronic hepatitis<br>Hepatocellular<br>disease <sup>1</sup>            | -0.293                                  | 070.22,<br>070.23,<br>070.31-<br>070.33,<br>070.44,<br>070.54,<br>571.0X,<br>571.3X,<br>571.4X,<br>571.8X,<br>571.9X,<br>572.XX-<br>573.0X,<br>130.5X | Deep vein<br>thrombosis/pulmonary<br>embolism                                                                           | -1.98                                   | 415.XX,<br>416.2X,<br>452.XX-<br>453.3X,<br>453.50-<br>453.7X,<br>453.9X |
|                                                                        |                                         |                                                                                                                                                       | <b>Immunologic</b>                                                                                                      |                                         |                                                                          |
|                                                                        |                                         |                                                                                                                                                       | Acquired Immune<br>Deficiency<br>Syndrome (AIDS)                                                                        | -2.91                                   | 042.XX,<br>079.53                                                        |
|                                                                        |                                         |                                                                                                                                                       | <b>Integumentary</b>                                                                                                    |                                         |                                                                          |
|                                                                        |                                         |                                                                                                                                                       | Solar actinic keratosis                                                                                                 | 0                                       | 702.0X                                                                   |
|                                                                        |                                         |                                                                                                                                                       | <b>Musculoskeletal</b>                                                                                                  |                                         |                                                                          |
| Cirrhosis<br>Liver transplant                                          | -4.30                                   | 571.2X,<br>571.5X,<br>571.6X,<br>V42.7X,<br>50.51,<br>50.59                                                                                           | Connective tissue<br>disease<br>Sjogren's disease<br>Dermatomyositis<br>Polymyositis<br>Systemic lupus<br>erythematosus | -3.02                                   | 695.4X,<br>710.XX                                                        |
| Colon polyp                                                            | -0.010                                  | 211.3X                                                                                                                                                |                                                                                                                         |                                         |                                                                          |
| Diverticulosis<br>Diverticulitis                                       | -0.624                                  | 562.XX                                                                                                                                                | Gout                                                                                                                    | -1.34                                   | 274.XX                                                                   |
| Gallstones                                                             | -0.929                                  | 574.XX,<br>997.41                                                                                                                                     | Herniated disc<br>Hip fracture                                                                                          | -3.27<br>-3.56                          | 722.XX<br>733.14,<br>733.15,<br>733.96,<br>808.0X,<br>808.1X,<br>820.XX  |
| Hepatitis not specified<br>as chronic                                  | -0.147                                  | 070.0X-<br>070.21,<br>070.30,<br>070.41-<br>070.43,<br>070.49-<br>070.53,<br>070.59-<br>070.9X,<br>571.1X,<br>573.1X-<br>573.4X                       | Hip replacement<br>surgery                                                                                              | -3.55                                   | 81.51-<br>81.53,<br>V43.64,<br>00.70-<br>00.73                           |
| Inflammatory bowel<br>disease<br>Crohn's disease<br>Ulcerative colitis | -1.07                                   | 555.XX,<br>556.XX,<br>558.XX                                                                                                                          | Knee replacement<br>surgery                                                                                             | -9.11                                   | 81.54,<br>81.55,<br>00.80-<br>00.84,<br>V43.65                           |
| Pancreatitis                                                           | -0.675                                  | 577.0X-<br>577.2X                                                                                                                                     | Osteoarthritis                                                                                                          | -3.52                                   | 715.XX                                                                   |
| Ulcer, peptic                                                          | -1.08                                   | 531.XX-<br>534.XX                                                                                                                                     | Osteoporosis                                                                                                            | -0.997                                  | 733.0X                                                                   |
|                                                                        |                                         |                                                                                                                                                       | Rheumatoid arthritis                                                                                                    | -3.79                                   | 714.XX                                                                   |
|                                                                        |                                         |                                                                                                                                                       | Vertebral fracture                                                                                                      | -2.07                                   | 733.13,<br>805.XX,<br>806.XX                                             |
| <b>Hematologic</b>                                                     |                                         |                                                                                                                                                       | Wrist fracture                                                                                                          | 0                                       | 814.XX                                                                   |
| Pernicious anemia                                                      | -1.82                                   | 281.0X                                                                                                                                                | <b>Nervous</b>                                                                                                          |                                         |                                                                          |
|                                                                        |                                         |                                                                                                                                                       | Amyotrophic lateral<br>sclerosis (ALS)                                                                                  | -7.45                                   | 335.2X                                                                   |

| Chronic disease or condition                    | Multimorbidity-weighted index weighting | ICD-9-CM codes                                                                                            | Chronic disease or condition                 | Multimorbidity-weighted index weighting | ICD-9-CM codes                                                                                            |
|-------------------------------------------------|-----------------------------------------|-----------------------------------------------------------------------------------------------------------|----------------------------------------------|-----------------------------------------|-----------------------------------------------------------------------------------------------------------|
| Dementia<br>Alzheimer disease                   | -6.10                                   | 290.XX,<br>294.1X-<br>294.2X,<br>331.0X-<br>331.2X,<br>331.7X,<br>331.5X,<br>331.82                       | <b>Ophthalmologic</b><br>Cataract            | -0.288                                  | 366.XX,<br>379.26,<br>379.31,<br>379.39,<br>743.30-<br>743.34,<br>743.39,<br>V43.1X,<br>V45.61            |
| Migraine headache                               | -0.614                                  | 346.XX                                                                                                    | Glaucoma                                     | -0.427                                  | 362.85,<br>365.XX,<br>377.14                                                                              |
| Multiple sclerosis                              | -10.6                                   | 340.XX                                                                                                    |                                              |                                         |                                                                                                           |
| Parkinson disease                               | -8.82                                   | 332.XX                                                                                                    | Macular degeneration                         | -0.564                                  | 362.5X                                                                                                    |
| Restless legs syndrome                          | -2.23                                   | 333.94                                                                                                    | <b>Oral</b>                                  |                                         |                                                                                                           |
| Seizure disorder<br>Epilepsy                    | -0.841                                  | 345.XX                                                                                                    | Periodontal disease                          | -0.164                                  | 523.1X-<br>523.32,<br>523.4X-<br>523.5X,<br>523.8X,<br>523.9X                                             |
| Cerebrovascular disease and stroke              | -3.79                                   | 430.XX-<br>434.XX,<br>437.XX,<br>438.XX,<br>443.21,<br>997.02,<br>852.0X-<br>852.39,<br>853.0X,<br>854.1X | <b>Psychiatric</b>                           |                                         |                                                                                                           |
| Transient ischemic attack                       | -1.24                                   | 435.XX                                                                                                    | Alcohol abuse                                | -1.37                                   | 291.XX,<br>303.XX,<br>305.0X,<br>V11.3X                                                                   |
| <b>Oncologic</b>                                |                                         |                                                                                                           | Depression                                   | -1.29                                   | 296.20-<br>296.36,<br>296.82,<br>298.0X,<br>300.4X,<br>309.0X,<br>309.1X,<br>311.XX                       |
| Basal cell carcinoma                            | 0                                       | 173.X1                                                                                                    | <b>Pulmonary</b>                             |                                         |                                                                                                           |
| Bladder cancer                                  | -0.99                                   | 188.XX                                                                                                    | Asthma                                       | -1.62                                   | 493.XX                                                                                                    |
| Breast cancer                                   | -0.886                                  | 174.XX-<br>175.XX,<br>233.0X                                                                              | Chronic obstructive pulmonary disease (COPD) | -4.32                                   | 490.XX-<br>492.8X,<br>494.0X,<br>494.1X,<br>496.XX,<br>518.1X,<br>518.2X,<br>770.2X,<br>958.7X,<br>998.81 |
| Cervical cancer                                 | -0.723                                  | 180.XX                                                                                                    | Chronic bronchitis                           |                                         |                                                                                                           |
| Colon cancer                                    | -1.18                                   | 153.XX                                                                                                    | Emphysema                                    |                                         |                                                                                                           |
| Leukemia                                        | -1.32                                   | 200.XX-<br>208.XX,<br>238.6X,<br>273.3X                                                                   |                                              |                                         |                                                                                                           |
| Lymphoma                                        |                                         |                                                                                                           |                                              |                                         |                                                                                                           |
| Lung cancer                                     | -6.25                                   | 162.XX                                                                                                    |                                              |                                         |                                                                                                           |
| Melanoma                                        | 0                                       | 172.XX                                                                                                    |                                              |                                         |                                                                                                           |
| Other cancer<br>Neoplasms of unspecified nature | -1.76                                   | 239.XX                                                                                                    |                                              |                                         |                                                                                                           |
| Ovarian cancer                                  | -1.87                                   | 183.XX                                                                                                    |                                              |                                         |                                                                                                           |
| Prostate cancer                                 | -0.402                                  | 185.0X                                                                                                    |                                              |                                         |                                                                                                           |
| Squamous cell carcinoma                         | 0                                       | 173.X2                                                                                                    |                                              |                                         |                                                                                                           |
| Uterine cancer                                  | -0.753                                  | 182.1X,<br>182.8X,<br>179.0X                                                                              |                                              |                                         |                                                                                                           |

| Chronic disease or condition            | Multimorbidity-weighted index weighting | ICD-9-CM codes                                                       | Chronic disease or condition                      | Multimorbidity-weighted index weighting | ICD-9-CM codes                    |
|-----------------------------------------|-----------------------------------------|----------------------------------------------------------------------|---------------------------------------------------|-----------------------------------------|-----------------------------------|
| <b>Renal</b>                            |                                         |                                                                      | <b>Reproductive</b>                               |                                         |                                   |
| Chronic kidney disease <sup>1</sup>     | -3.98                                   | 283.11, 403.XX, 404.XX, 572.4X, 580.XX-583.9X, 585.XX, 587.XX-589.XX | Benign breast disease                             | 0                                       | 217.XX                            |
|                                         |                                         |                                                                      | Benign prostatic hyperplasia (BPH)                | 0                                       | 600.XX                            |
|                                         |                                         |                                                                      | Ectopic pregnancy                                 | 0                                       | 633.XX                            |
|                                         |                                         |                                                                      | Endometriosis                                     | -0.142                                  | 617.XX                            |
|                                         |                                         |                                                                      | Erectile dysfunction                              | -1.22                                   | 302.72, 607.84                    |
|                                         |                                         |                                                                      | Polycystic ovary syndrome                         | -0.640                                  | 256.4X                            |
| Interstitial and other chronic cystitis | -0.879                                  | 595.1X-595.9X                                                        | Premenstrual syndrome                             | -0.412                                  | 625.4X                            |
| Calculus of kidney and ureter           | -0.291                                  | 592.XX                                                               | Prostate surgery for benign prostatic hyperplasia | 0                                       | 60.21, 60.29, 60.95, 60.96, 60.97 |
| <b>Reproductive</b>                     |                                         |                                                                      | Uterine fibroid                                   | -0.029                                  | 218.XX                            |
| Benign breast disease                   | 0                                       | 217.XX                                                               |                                                   |                                         |                                   |

<sup>1</sup>Intentional overlap in the codes for high blood pressure and chronic kidney disease (403.01-403.91), congestive heart failure and chronic kidney disease (404.01, 404.03, 404.11, 404.13, 404.91, 404.93), and chronic hepatitis/hepatocellular disease and chronic kidney disease (572.4X) is due to mentioned codes encompassing both conditions.

<sup>2</sup>Intentional overlap in codes for hyperthyroidism and thyroid nodule/goiter is due to codes 242.01, 242.11, 242.21, 242.31, and 242.41 that apply to both conditions.

**Supplementary Table S2. Prevalence of chronic conditions based on self-report versus ICD-coded conditions at baseline in 2006.**

| Condition                          | N=10,488*<br>(based on self-report) | Self-Report  | ICD-Coded    |
|------------------------------------|-------------------------------------|--------------|--------------|
| Dementia                           | 7964                                | 289 (3.6%)   | 588 (5.9%)   |
| Stroke                             | 8283                                | 902 (10.9%)  | 1281 (12.9%) |
| Angina                             | 8041                                | 721 (9.0%)   | 533 (5.4%)   |
| Congestive heart failure           | 8040                                | 473 (5.9%)   | 1460 (14.7%) |
| Heart surgery                      | 8054                                | 247 (3.1%)   | 135 (1.4%)   |
| Hypertension                       | 8274                                | 5492 (66.4%) | 7071 (71.3%) |
| Myocardial infarction/Heart attack | 8043                                | 231 (2.9%)   | 660 (6.7%)   |
| Other heart condition              | 8292                                | 1531 (18.5%) | 2452 (24.7%) |
| Lung disease                       | 8280                                | 1049 (12.7%) | 1727 (17.4%) |
| Diabetes                           | 8283                                | 1971 (23.8%) | 2944 (29.7%) |
| Cancer                             | 8281                                | 1551 (18.7%) | 1328 (13.4%) |
| Arthritis                          | 8278                                | 5857 (70.8%) | 2875 (29.0%) |
| Hip replacement                    | 8292                                | 62 (0.8%)    | 166 (1.7%)   |
| Knee replacement                   | 8292                                | 211 (2.5%)   | 286 (2.9%)   |
| Glaucoma                           | 8266                                | 308 (3.7%)   | 1391 (14.0%) |

\* N in Supplementary Table S2 did not exclude Medicare beneficiaries without continuous enrollment in Medicare Parts A and B in 2006.

**Supplementary Table S3. Hazard ratios for mortality after 10-year follow-up, 2006-2016, N=9,923.**

|                                                     |                       | N=9,923 |          |                  |
|-----------------------------------------------------|-----------------------|---------|----------|------------------|
| Deaths                                              | N=4465                |         |          |                  |
| Model                                               | HR (95% CI)           | P Value | AIC      | C-statistic (SE) |
| MWI-ICD, continuous, standardized                   | 1.60 (1.56, 1.64)     | <0.001  | 78651.71 | 0.642 (0.004)    |
| MWI-ICD, quartiles                                  |                       |         |          |                  |
| Q4                                                  | 3.28 (3.01, 3.57)     | <0.001  | 78763.31 | 0.632 (0.004)    |
| Q3                                                  | 1.80 (1.64, 1.97)     | <0.001  |          |                  |
| Q2                                                  | 1.10 (1.00, 1.22)     | 0.05    |          |                  |
| Q1 (reference)                                      | 1.0                   |         |          |                  |
|                                                     | <i>P</i> trend <0.001 |         |          |                  |
| MWI-ICD, continuous, standardized, adjusted for sex | 1.60 (1.56, 1.64)     | <0.001  | 78617.49 | 0.645 (0.004)    |
| MWI-ICD, quartiles, adjusted for sex                |                       |         |          |                  |
| Q4                                                  | 3.31 (3.04, 3.61)     | <0.001  | 78729.16 | 0.639 (0.004)    |
| Q3                                                  | 1.82 (1.66, 1.99)     | <0.001  |          |                  |
| Q2                                                  | 1.11 (1.01, 1.22)     | 0.04    |          |                  |
| Q1 (reference)                                      | 1                     |         |          |                  |
|                                                     | <i>P</i> trend <0.001 |         |          |                  |
| MWI-ICD, linear                                     | 1.74 (1.67, 1.81)     | <0.001  |          |                  |
| MWI-ICD, quadratic                                  | 0.96 (0.94, 0.97)     | <0.001  | 78625.85 | 0.642 (0.004)    |
| MWI-ICD, linear                                     | 1.73 (1.66, 1.80)     | <0.001  |          |                  |
| MWI-ICD, quadratic                                  | 1.00 (0.96, 1.04)     | 0.99    |          |                  |
| MWI-ICD, cubic                                      | 0.99 (0.98, 1.00)     | 0.03    | 78623.08 | 0.642 (0.004)    |
| Simple Disease Count, continuous, standardized      | 1.44 (1.40, 1.48)     | <0.001  | 79152.34 | 0.602 (0.004)    |
| Simple Disease Count, quartiles                     |                       |         |          |                  |
| Q4                                                  | 2.22 (2.04, 2.42)     | <0.001  | 79255.97 | 0.592 (0.004)    |
| Q3                                                  | 1.33 (1.21, 1.46)     | <0.001  |          |                  |
| Q2                                                  | 1.02 (0.93, 1.12)     | 0.68    |          |                  |
| Q1 (reference)                                      | 1.0                   |         |          |                  |
|                                                     | <i>P</i> trend <0.001 |         |          |                  |
| Simple Disease Count, linear                        | 1.43 (1.37, 1.48)     | <0.001  |          |                  |
| Simple Disease Count, quadratic                     | 1.01 (0.99, 1.02)     | 0.32    | 79153.39 | 0.602 (0.004)    |
| Simple Disease Count, linear                        | 1.45 (1.40, 1.51)     | <0.001  |          |                  |
| Simple Disease Count, quadratic                     | 1.10 (1.07, 1.14)     | <0.001  |          |                  |
| Simple Disease Count, cubic                         | 0.97 (0.97, 0.98)     | <0.001  | 79119.12 | 0.602 (0.004)    |
| Charlson Index, continuous, standardized            | 1.54 (1.50, 1.57)     | <0.001  | 78743.11 | 0.643 (0.004)    |
| Charlson Index, quartiles                           |                       |         |          |                  |
| Q4                                                  | 3.23 (2.99, 3.49)     | <0.001  | 78789.17 | 0.634 (0.004)    |
| Q3                                                  | 2.13 (1.94, 2.34)     | <0.001  |          |                  |
| Q2                                                  | 1.47 (1.34, 1.61)     | <0.001  |          |                  |
| Q1 (reference)                                      | 1.0                   |         |          |                  |
|                                                     | <i>P</i> trend <0.001 |         |          |                  |



|                                                         |                   |        |          |               |
|---------------------------------------------------------|-------------------|--------|----------|---------------|
| Charlson Index, linear                                  | 1.83 (1.75, 1.90) | <0.001 |          |               |
| Charlson Index, quadratic                               | 0.94 (0.92, 0.95) | <0.001 | 78647.00 | 0.643 (0.004) |
| Charlson Index, linear                                  | 1.90 (1.82, 1.99) | <0.001 |          |               |
| Charlson Index, quadratic                               | 0.87 (0.84, 0.90) | <0.001 |          |               |
| Charlson Index, cubic                                   | 1.01 (1.01, 1.02) | <0.001 | 78631.64 | 0.643 (0.004) |
| NJ Medicare Charlson, continuous, standardized          | 1.65 (1.61, 1.68) | <0.001 | 78433.98 | 0.656 (0.004) |
| NJ Medicare Charlson, quartiles                         |                   |        |          |               |
| Q4                                                      | 3.82 (3.54, 4.13) | <0.001 | 78508.51 | 0.647 (0.004) |
| Q3                                                      | 2.14 (1.93, 2.37) | <0.001 |          |               |
| Q2                                                      | 1.48 (1.36, 1.61) | <0.001 |          |               |
| Q1 (reference)                                          | 1.0               |        |          |               |
|                                                         | P trend <0.001    |        |          |               |
| Elixhauser Score, continuous, standardized              | 1.62 (1.58, 1.66) | <0.001 | 78597.46 | 0.642 (0.004) |
| Elixhauser Score, quartiles                             |                   |        |          |               |
| Q4                                                      | 2.90 (2.61, 3.23) | <0.001 | 78849.09 | 0.624 (0.004) |
| Q3                                                      | 1.48 (1.30, 1.67) | <0.001 |          |               |
| Q2                                                      | 1.11 (0.99, 1.24) | 0.09   |          |               |
| Q1 (reference)                                          | 1.0               |        |          |               |
|                                                         | P trend <0.001    |        |          |               |
| Elixhauser Score, linear                                | 1.74 (1.67, 1.81) | <0.001 |          |               |
| Elixhauser Score, quadratic                             | 0.97 (0.95, 0.98) | <0.001 | 78579.03 | 0.642 (0.004) |
| Elixhauser Score, linear                                | 1.72 (1.65, 1.80) | <0.001 |          |               |
| Elixhauser Score, quadratic                             | 1.02 (0.98, 1.06) | 0.41   |          |               |
| Elixhauser Score, cubic                                 | 0.99 (0.98, 1.00) | 0.01   | 78573.03 | 0.642 (0.004) |
| van Walraven Elixhauser Score, continuous, standardized | 1.62 (1.58, 1.66) | <0.001 | 78518.36 | 0.648 (0.004) |
| van Walraven Elixhauser Score, quartiles                |                   |        |          |               |
| Q4                                                      | 2.79 (2.46, 3.17) | <0.001 | 78664.66 | 0.636 (0.004) |
| Q3                                                      | 1.35 (1.18, 1.54) | <0.001 |          |               |
| Q2                                                      | 0.85 (0.74, 0.96) | 0.01   |          |               |
| Q1 (reference)                                          | 1.0               |        |          |               |
|                                                         | P trend <0.001    |        |          |               |
| HRQOL-Comorbidity Index, continuous, standardized       | 1.48 (1.45, 1.53) | <0.001 | 79035.36 | 0.614 (0.004) |
| HRQOL-Comorbidity Index, quartiles                      |                   |        |          |               |
| Q4                                                      | 2.49 (2.28, 2.72) | <0.001 | 79169.68 | 0.602 (0.004) |
| Q3                                                      | 1.49 (1.35, 1.64) | <0.001 |          |               |
| Q2                                                      | 1.11 (1.00, 1.22) | 0.04   |          |               |
| Q1 (reference)                                          | 1.0               |        |          |               |
|                                                         | P trend <0.001    |        |          |               |

Abbreviations: MWI-ICD, Multimorbidity-Weighted Index-ICD coded conditions; AIC, Akaike Information Criterion; C, concordance; HR, hazard ratio; Q, quartile; ICD, International Classification of Diseases; SE, standard error; HRQOL, health-related quality of life

**Supplementary Table S4. Short Form-36 physical functioning by standardized metrics after 8-years of follow-up from baseline, 2006-2014. N=4,950, physical functioning mean 48.6±31.8.**

| Model                                          | $\beta$ coefficient (95% CI) | P Value | T Value | R <sup>2</sup> |
|------------------------------------------------|------------------------------|---------|---------|----------------|
| MWI-ICD, continuous, standardized              | -12.50 (-13.54, -11.47)      | <0.001  | -23.66  | 0.11           |
| MWI-ICD, quartiles                             |                              |         |         |                |
| Q4                                             | -28.51 (-31.11, -25.92)      | <0.001  | -21.52  | 0.10           |
| Q3                                             | -18.20 (-20.50, -15.90)      | <0.001  | -15.51  |                |
| Q2                                             | -6.79 (-8.96, -4.61)         | <0.001  | -6.13   |                |
| Q1 (reference)                                 | 0                            |         |         |                |
| MWI-ICD, continuous, adjusted for sex          | -12.21 (-13.23, -11.19)      | <0.001  | -23.46  | 0.13           |
| MWI-ICD, quartiles, adjusted for sex           |                              |         |         |                |
| Q4                                             | -27.99 (-30.54, -25.43)      | <0.001  | -21.47  | 0.13           |
| Q3                                             | -17.60 (-19.86, -15.33)      | <0.001  | -15.23  |                |
| Q2                                             | -6.62 (-8.75, -4.48)         | <0.001  | -6.07   |                |
| Q1 (reference)                                 | 0                            |         |         |                |
| MWI-ICD, linear                                | -14.22 (-15.40, -13.03)      | <0.001  |         |                |
| MWI-ICD, quadratic                             | 2.29 (1.50, 3.07)            | <0.001  | 5.73    | 0.11           |
| MWI-ICD, linear                                | -13.84 (-15.24, -12.44)      | <0.001  |         |                |
| MWI-ICD, quadratic                             | 2.90 (1.44, 4.37)            | <0.001  |         |                |
| MWI-ICD, cubic                                 | -0.27 (-0.80, 0.26)          | 0.33    | -0.98   | 0.11           |
| Simple Disease Count, continuous, standardized | -9.54 (-10.51, -8.56)        | <0.001  | -19.13  | 0.07           |
| Simple Disease Count                           |                              |         |         |                |
| Q4                                             | -21.91 (-24.42, -19.39)      | <0.001  | -17.07  | 0.06           |
| Q3                                             | -12.57 (-15.02, -10.11)      | <0.001  | -10.02  |                |
| Q2                                             | -4.61 (-6.93, -2.28)         | 0.001   | -3.88   |                |
| Q1 (reference)                                 | 0                            |         |         |                |
| Simple Disease Count, linear                   | -9.64 (-10.66, -8.61)        | <0.001  |         |                |
| Simple Disease Count, quadratic                | 0.23 (-0.50, 0.95)           | 0.54    | 0.61    | 0.07           |
| Simple Disease Count, linear                   | -10.37 (-11.79, -8.95)       | <0.001  |         |                |
| Simple Disease Count, quadratic                | -0.34 (-1.39, 0.70)          | 0.52    |         |                |
| Simple Disease Count, cubic                    | 0.34 (-0.12, 0.80)           | 0.14    | 14.6    | 0.07           |
| Charlson Index, continuous, standardized       | -9.42 (-10.52, -8.32)        | <0.001  | -16.77  | 0.05           |
| Charlson Index                                 |                              |         |         |                |
| Q4                                             | -20.47 (-22.83, -18.14)      | <0.001  | -17.03  | 0.06           |
| Q3                                             | -12.19 (-14.83, -9.55)       | <0.001  | -9.07   |                |
| Q2                                             | -7.41 (-9.61, -5.22)         | <0.001  | -6.63   |                |
| Q1 (reference)                                 | 0                            |         |         |                |
| Charlson Index, linear                         | -11.95 (-13.34, -10.57)      | <0.001  |         |                |
| Charlson Index, quadratic                      | 2.10 (1.40, 2.80)            | <0.001  | 5.86    | 0.06           |
| Charlson Index, linear                         | -11.88 (-13.27, -10.50)      | <0.001  |         |                |
| Charlson Index, quadratic                      | 3.28 (1.65, 4.90)            | <0.001  |         |                |
| Charlson Index, cubic                          | -0.31 (-0.70, 0.08)          | 0.12    | -1.57   | 0.06           |

|                                                   |                         |        |        |      |
|---------------------------------------------------|-------------------------|--------|--------|------|
| Elixhauser Score, continuous, standardized        | -11.20 (-12.28, -10.13) | <0.001 | -20.48 | 0.08 |
| Elixhauser Score                                  |                         |        |        |      |
| Q4                                                | -25.47 (-28.22, -22.73) | <0.001 | -18.22 | 0.08 |
| Q3                                                | -14.64 (-17.61, -11.67) | <0.001 | -9.67  |      |
| Q2                                                | -8.07 (-10.59, -5.55)   | <0.001 | -6.27  |      |
| Q1 (reference)                                    | 0                       |        |        |      |
| Elixhauser Score, linear                          | -12.22 (-13.41, -11.04) | <0.001 |        |      |
| Elixhauser Score, quadratic                       | 1.56 (0.78, 2.34)       | <0.001 | 3.93   | 0.08 |
| Elixhauser Score, linear                          | -12.00 (-13.35, -10.64) | <0.001 |        |      |
| Elixhauser Score, quadratic                       | 1.93 (0.61, 3.25)       | 0.004  |        |      |
| Elixhauser Score, cubic                           | -0.15 (-0.58, 0.28)     | 0.50   | -0.68  | 0.08 |
| HRQOL-Comorbidity Index, continuous, standardized | -11.62 (-12.58, -10.67) | <0.001 | -23.85 | 0.10 |
| HRQOL-Comorbidity Index, quartiles                |                         |        |        |      |
| Q4                                                | -26.34 (-28.87, -23.81) | <0.001 | -20.39 | 0.09 |
| Q3                                                | -16.74 (-19.22, -14.26) | <0.001 | -13.24 |      |
| Q2                                                | -6.48 (-8.78, -4.18)    | <0.001 | -5.52  |      |
| Q1 (reference)                                    | 0                       |        |        |      |

Abbreviations: CI, confidence interval; HRQOL, health-related quality of life; ICD, International Classification of Diseases; MWI-ICD, Multimorbidity-Weighted Index-ICD coded conditions; Q, Quartile; R<sup>2</sup>, coefficient of determination.

**Supplementary Figure S1. Lorenz curves for Gini index values for measures of multimorbidity at baseline, 2006.**

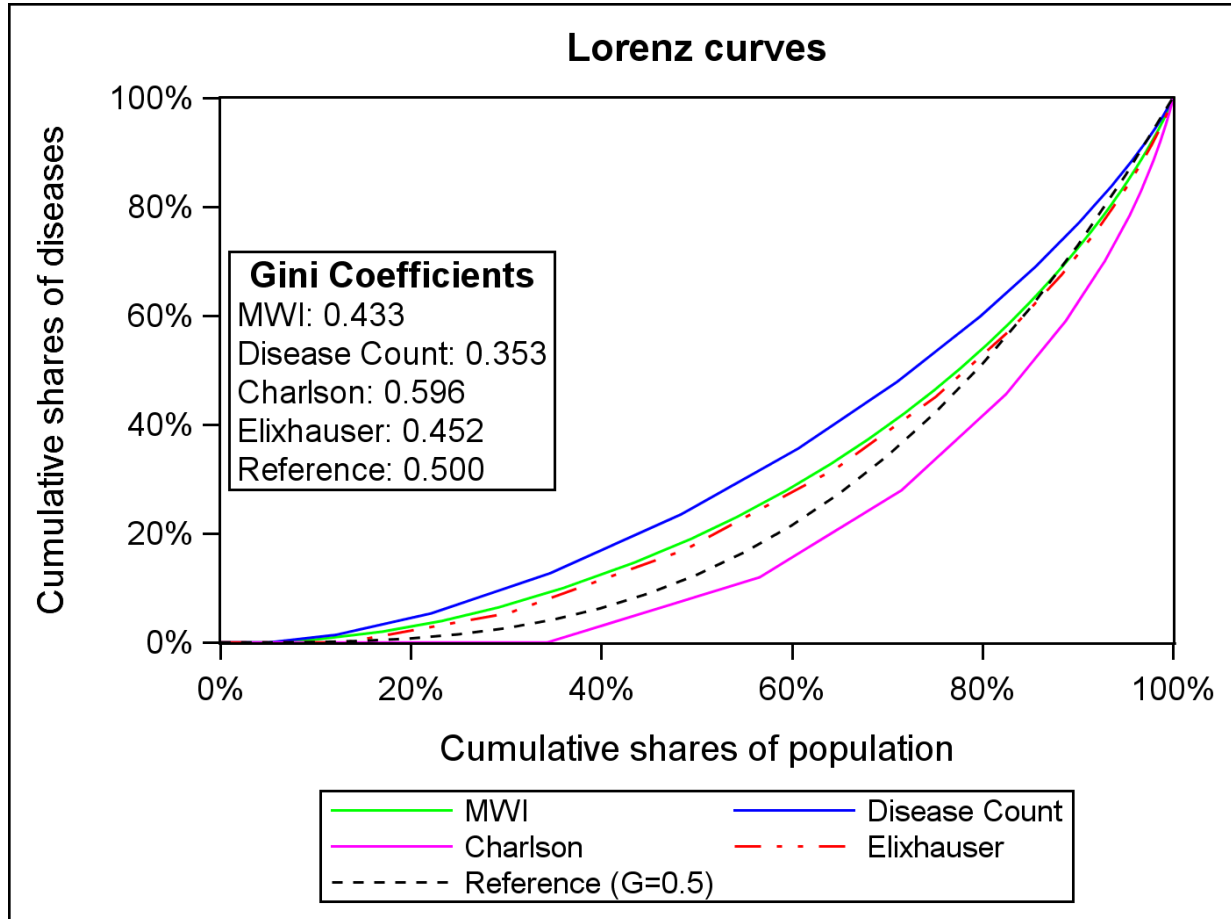

**Supplementary Figure S2. The distribution of the ICD-coded multimorbidity weighted index (MWI-ICD) most closely follows an exponential function.**

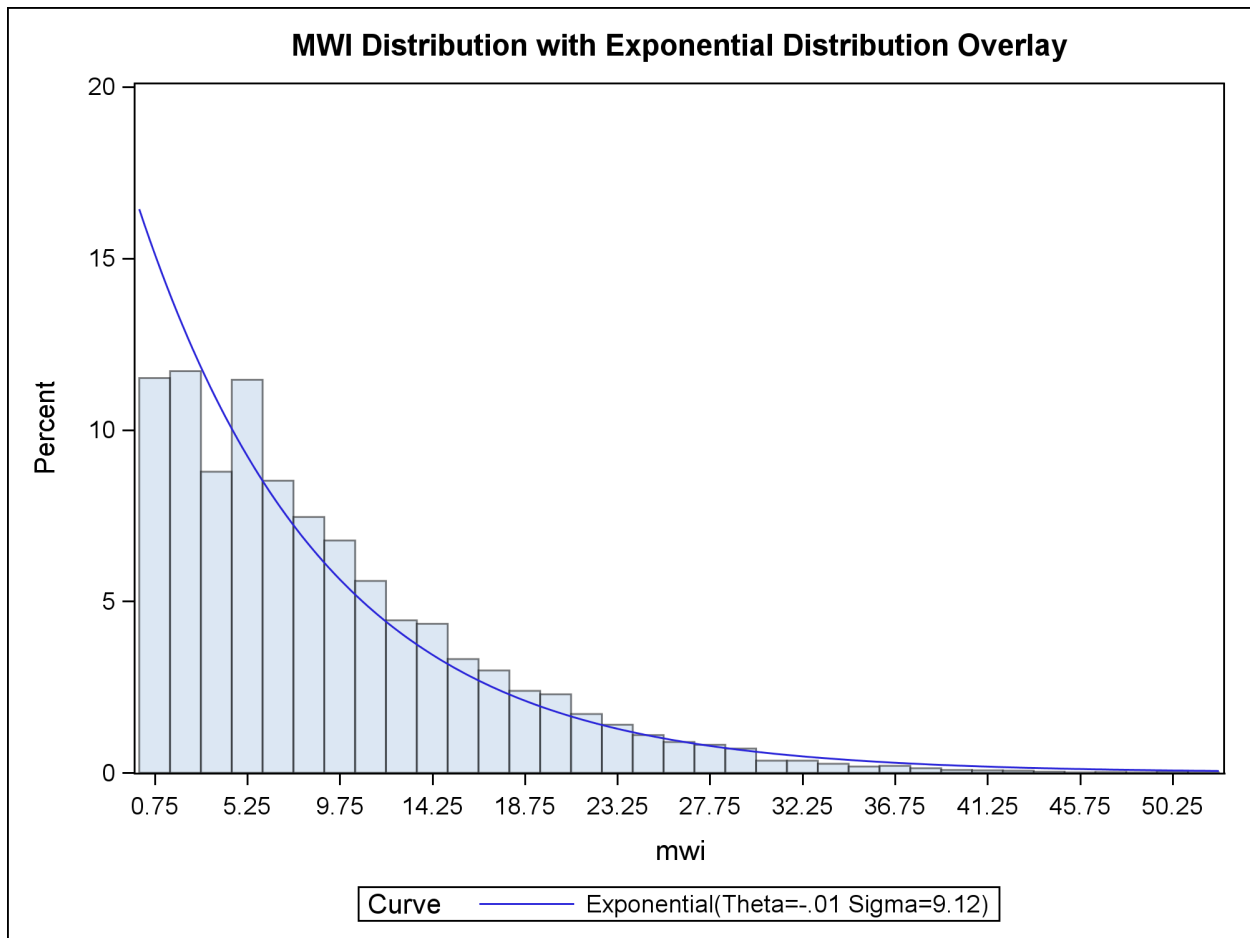

## Supplementary Appendix S1. SAS macro for ICD-coded multimorbidity-weighted index (MWI-ICD)

**/\* Multimorbidity-Weighted Index, ICD-9 Coded MACRO DEVELOPMENT**

By Joshua Petrie, University of Michigan

REQUIRED DATA INPUT (indata): A SAS dataset with 2 variables named "id" and "icd9code".  
 "id" contains unique subject identifiers. "icd9code" is a character variable containing ICD-9 diagnosis codes in a format that includes the decimal point (e.g. XXX.XX). The dataset should be in long format i.e. 1 row per ICD-9 code, more than 1 row per subject.

DATA OUTPUT (indata): A SAS dataset with 2 variables named "id" and "mwi". "id" contains unique subject identifiers. "mwi" contains the calculated multimorbidity weighted index score. The dataset will include 1 row per subject. \*/

```
%macro MWI(indata,outdata);
  PROC SORT DATA=&indata NODUPKEY;
    BY id icd9code;
  RUN;

  DATA &indata;
    SET &indata;
    IF prxmatch("/^413/",icd9code) THEN DO;
      diseaseid=1;*2.2 - angina;
      weight=2.2;
    END;
    ELSE IF prxmatch("/^441/", icd9code) THEN DO;
      diseaseid=2;*aortic aneurysm;
      weight=1.96;
    END;
    ELSE IF prxmatch("/^427\.31/",icd9code) THEN DO;
      diseaseid=3;*1.33 - atrial fibrillation;
      weight=1.33;
    END;
    ELSE IF prxmatch("m/^37\.9[4-8]|\^V45\.02|\^V53\.32|\^996\.04/i",icd9code)
  THEN DO;*37.X are procedure codes i.e. NOT 037.X;
      diseaseid=4;*1.57 - automated implantable cardioverter
  defibrillator (AICD);
      weight=1.57;
    END;
    ELSE IF prxmatch("/^425\.1[1-9]|\^425\.2[2-
  9]|\^428|\^398\.91|\^402\.0[0,1,9]1|\^404\.0[0,1,9][1,3]/",icd9code) THEN DO;*Codes 404.01,
  404.03, 404.11, 404.13, 404.91, and 404.93 overlap with chronic kidney disease below.
  Weight as congestive heart failure, but retain to facilitate individual condition
  flagging.;
      diseaseid=5;*4.77 - congestive heart failure;
      weight=4.77;
    END;
    ELSE IF prxmatch("/^36\.1/",icd9code) THEN DO;*36.X are procedure codes
  i.e. NOT 036.X;
      diseaseid=6;*coronary artery bypass graft surgery;
      weight=0.724;
    END;
    ELSE IF
  prxmatch("/^070\.2[2,3]|\^070\.3[2,3]|\^070\.4[4,5]4|\^571\.0[0,3,4,8,9]|\^572|\^573\.0|\^130\
  .5/", icd9code) THEN DO;*Codes 572.4X overlap with chronic kidney disease below.
  Weight as chronic hepatitis, but retain to facilitate individual condition flagging.;
      diseaseid=19;*chronic hepatitis, hepatocellular disease;
      weight=0.293;
    END;
  END;
```

```

ELSE IF prxmatch("/^283\.11|^40[3,4]^572\.4|^58[0-3,5-9]^591/",
icd9code) THEN DO;*Codes 403.10-403.91 overlap with high blood pressure below. Weight
as chronic kidney disease, but retain to facilitate individual condition flagging.;
diseaseid=73;*chronic kidney disease;
weight=3.98;
END;
ELSE IF prxmatch("/^401|^402\.[0,1,9]0|^403\.[1-
8]^403\.9[0,1]^405/",icd9code) THEN DO;
diseaseid=7;*high blood pressure;
weight=1.53;
END;
ELSE IF prxmatch("/^394\.9|^424\.0/",icd9code) THEN DO;
diseaseid=8;*mitral valve prolapse;
weight=0.033;
END;
ELSE IF prxmatch("/^410|^411\.[0,1]^412|^429\.79/",icd9code) THEN DO;
diseaseid=9;*myocardial infarction;
weight=1.73;
END;
ELSE IF prxmatch("m/^443\.8[1-
9]^443\.9|^447\.1|^785\.4|^V43\.4|^38\.48|^440\.[1-9]/i",icd9code) THEN DO;*38.48 is
a procedure code i.e. NOT 038.48;
diseaseid=10;*peripheral artery disease/atherosclerosis of
extremities;
weight=3.25;
END;
ELSE IF prxmatch("m/^394\.[0,2]^396|^397\.0|^424\.[1-
3]^429\.71|^746\.[3-6]^V42\.2|^V43\.3/i", icd9code) THEN DO;
diseaseid=11;*valvular heart Disease;
weight=0.416;
END;
ELSE IF prxmatch("m/^249|^250|^V58\.67|^V53\.91|^E93\.23/i",icd9code)
THEN DO;
diseaseid=12;*diabetes;
weight=2.67;
END;
ELSE IF prxmatch("/^272\.[0,2,4,6,7]/", icd9code) THEN DO;
diseaseid=13;*elevated cholesterol;
weight=0.343;
END;
ELSE IF prxmatch("/^242\.[0-4,8,9]1/", icd9code) THEN DO;
diseaseid=14;*hyper-thyroidism;
weight=0.149;
END;
ELSE IF prxmatch("/^272\.[1,3]/", icd9code) THEN DO;
diseaseid=15;*hypertriglyceridemia;
weight=0.692;
END;
ELSE IF prxmatch("/^24[3-4]/", icd9code) THEN DO;
diseaseid=16;*hypothyroidism;
weight=0.808;
END;
ELSE IF prxmatch("/^242\.[0-3]^242\.4[0,1]/", icd9code) THEN DO;
diseaseid=17;*thyroid nodule;
weight=0;
END;
ELSE IF prxmatch("/^530\.85/", icd9code) THEN DO;
diseaseid=18;*barretts esophagus;
weight=0.284;
END;
ELSE IF prxmatch("m/^571\.[2,5,6]^V42\.7|^50\.5[1,9]/i", icd9code) THEN
DO;*50.5X are procedure codes i.e. NOT 050.5X;
diseaseid=20;*cirrhosis, liver transplant;

```

```

        weight=4.3;
      END;
    ELSE IF prxmatch("/^211\[3]/", icd9code) THEN DO;
      diseaseid=21;*colon polyp;
      weight=0.01;
    END;
  ELSE IF prxmatch("/^562/", icd9code) THEN DO;
    diseaseid=22;*diverticulosis, diverticulitis;
    weight=0.624;
  END;
  ELSE IF prxmatch("/^574|^997\.41/", icd9code) THEN DO;
    diseaseid=23;*gallstones;
    weight=0.929;
  END;
  ELSE IF prxmatch("/^070\[0,1,6-9]|^070\.2[0,1]|^070\.3[0,1]|^070\.4[1-3,9]|^070\.5[0-3,9]|^571\.1|^573\[1-4]/", icd9code) THEN DO;
    diseaseid=24;*hepatitis not specified as chronic;
    weight=0.147;
  END;
  ELSE IF prxmatch("/^55[5,6,8]/", icd9code) THEN DO;
    diseaseid=25;*inflammatory bowel disease;
    weight=1.07;
  END;
  ELSE IF prxmatch("/^577\[0,1,2]/", icd9code) THEN DO;
    diseaseid=26;*Pancreatitis;
    weight=0.675;
  END;
  ELSE IF prxmatch("/^53[1-4]/", icd9code) THEN DO;
    diseaseid=27;*ulcer, peptic;
    weight=1.08;
  END;
  ELSE IF prxmatch("/^281\.0/", icd9code) THEN DO;
    diseaseid=28;*pernicious anemia;
    weight=1.82;
  END;
  ELSE IF prxmatch("/^415|^416\.2|^452|^453\[3,5-7,9]/", icd9code) THEN
DO;
    diseaseid=29;*venous thrombo-embolism (pulmonary embolus,
deep venous thrombosis);
    weight=1.98;
  END;
  ELSE IF prxmatch("/^042|^079\.53/", icd9code) THEN DO;
    diseaseid=30;*acquired immune deficiency syndrome (AIDS);
    weight=2.91;
  END;
  ELSE IF prxmatch("/^702\.0/", icd9code) THEN DO;
    diseaseid=31;*solar actinic keratosis;
    weight=0;
  END;
  ELSE IF prxmatch("/^695\.4|^710/", icd9code) THEN DO;
    diseaseid=32;*connective tissue disease;
    weight=3.02;
  END;
  ELSE IF prxmatch("/^274/", icd9code) THEN DO;
    diseaseid=33;*gout;
    weight=1.34;
  END;
  ELSE IF prxmatch("/^722/", icd9code) THEN DO;
    diseaseid=34;*herniated disc;
    weight=3.27;
  END;
  ELSE IF prxmatch("/^733\.1[4,5]|^733\.96|^808\[0,1]|^820/", icd9code)
THEN DO;

```



```

        diseaseid=35;*hip fracture;
        weight=3.56;
    END;
    ELSE IF prxmatch("m/^81\.5[1-3]|^V43\.64|^00\.7[0-3]/i", icd9code) THEN
DO;*81.5X and 00.7X are procedure codes i.e. NOT 081.5X or 000.7X;
        diseaseid=36;*hip replacement surgery;
        weight=3.55;
    END;
    ELSE IF prxmatch("m/^81\.5[4,5]|^00\.8[0-4]|^V43\.65/i", icd9code) THEN
DO;*81.X and 00.X are procedure codes i.e. NOT 081.X or 000.X;
        diseaseid=37;*knee replacement surgery;
        weight=9.11;
    END;
    ELSE IF prxmatch("/^715/", icd9code) THEN DO;
        diseaseid=38;*osteo-arthritis;
        weight=3.52;
    END;
    ELSE IF prxmatch("/^733\[0]/", icd9code) THEN DO;
        diseaseid=39;*osteoporosis;
        weight=0.997;
    END;
    ELSE IF prxmatch("/^714/", icd9code) THEN DO;
        diseaseid=40;*rheumatoid arthritis;
        weight=3.79;
    END;
    ELSE IF prxmatch("/^733\.13|^80[5,6]/", icd9code) THEN DO;
        diseaseid=41;*vertebral fracture;
        weight=2.07;
    END;
    ELSE IF prxmatch("/^814/", icd9code) THEN DO;
        diseaseid=42;*wrist fracture;
        weight=0;
    END;
    ELSE IF prxmatch("/^335\.2/", icd9code) THEN DO;
        diseaseid=43;*Amyotrophic lateral sclerosis (ALS);
        weight=7.45;
    END;
    ELSE IF prxmatch("/^290|^294\[1-2]|^331\[0-2,5,7]|^331\.82/",
icd9code) THEN DO;
        diseaseid=44;*dementia including alzheimer disease;
        weight=6.1;
    END;
    ELSE IF prxmatch("/^346/", icd9code) THEN DO;
        diseaseid=45;*migraine;
        weight=0.614;
    END;
    ELSE IF prxmatch("/^340/", icd9code) THEN DO;
        diseaseid=46;*multiple sclerosis;
        weight=10.6;
    END;
    ELSE IF prxmatch("/^332/", icd9code) THEN DO;
        diseaseid=47;*parkinson disease;
        weight=8.82;
    END;
    ELSE IF prxmatch("/^333\.94/", icd9code) THEN DO;
        diseaseid=48;*restless legs syndrome;
        weight=2.23;
    END;
    ELSE IF prxmatch("/^345/", icd9code) THEN DO;
        diseaseid=49;*seizure disorder and epilepsy;
        weight=0.841;
    END;
END;

```

```

ELSE IF prxmatch("/^43[0-4,7,8]|^443\.21|^997\.02|^852\.[0-3]|^853\.0|^854\.1/", icd9code) THEN DO;
    diseaseid=50;*stroke;
    weight=3.79;
END;
ELSE IF prxmatch("/^435/", icd9code) THEN DO;
    diseaseid=51;*transient ischemic attack;
    weight=1.24;
END;
ELSE IF prxmatch("/^173\.[0-9]1/", icd9code) THEN DO;
    diseaseid=52;*basal cell carcinoma;
    weight=0;
END;
ELSE IF prxmatch("/^188/", icd9code) THEN DO;
    diseaseid=53;*bladder cancer;
    weight=0.99;
END;
ELSE IF prxmatch("/^17[4-5]|^233\.0/", icd9code) THEN DO;
    diseaseid=54;*breast cancer;
    weight=0.886;
END;
ELSE IF prxmatch("/^180/", icd9code) THEN DO;
    diseaseid=55;*cervical cancer;
    weight=0.723;
END;
ELSE IF prxmatch("/^153/", icd9code) THEN DO;
    diseaseid=56;*colon cancer;
    weight=1.18;
END;
ELSE IF prxmatch("/^20[0-8]|^238\.6|^273\.3/", icd9code) THEN DO;
    diseaseid=57;*leukemia,lymphoma;
    weight=1.32;
END;
ELSE IF prxmatch("/^162/", icd9code) THEN DO;
    diseaseid=58;*lung cancer;
    weight=6.25;
END;
ELSE IF prxmatch("/^172/", icd9code) THEN DO;
    diseaseid=59;*melanoma;
    weight=0;
END;
ELSE IF prxmatch("/^239/", icd9code) THEN DO;
    diseaseid=60;*other cancer;
    weight=1.76;
END;
ELSE IF prxmatch("/^183/", icd9code) THEN DO;
    diseaseid=61;*ovarian cancer;
    weight=1.87;
END;
ELSE IF prxmatch("/^185/", icd9code) THEN DO;
    diseaseid=62;*prostate cancer;
    weight=0.402;
END;
ELSE IF prxmatch("/^173\.[0-9]2/", icd9code) THEN DO;
    diseaseid=63;*squamous cell carcinoma;
    weight=0;
END;
ELSE IF prxmatch("/^182\.[1,8]|^179/", icd9code) THEN DO;
    diseaseid=64;*uterine cancer;
    weight=0.753;
END;
ELSE IF prxmatch("m/^366|^379\.26|^379\.3[1,9]|^743\.3[0-4,9]|^v43\.1|^v45\.61/i", icd9code) THEN DO;

```

```

        diseaseid=65;*cataract;
        weight=0.288;
    END;
ELSE IF prxmatch("/^362\.85|^365|^377\.14/", icd9code) THEN DO;
    diseaseid=66;*glaucoma;
    weight=0.427;
    END;
ELSE IF prxmatch("/^362\.5/", icd9code) THEN DO;
    diseaseid=67;*macular degeneration;
    weight=0.564;
    END;
ELSE IF prxmatch("/^523\[1,2,4,5,8,9]^523\.3[0-2]/", icd9code) THEN DO;
    diseaseid=68;*periodontal disease;
    weight=0.164;
    END;
ELSE IF prxmatch("m/^291|^303|^305\.0|^V11\.3/i", icd9code) THEN DO;
    diseaseid=69;*alcohol abuse;
    weight=1.37;
    END;
ELSE IF prxmatch("/^296\.2|^296\.3[0-6]|^296\.82|^298\.0|^300\.4|^309\[0,1]^311/", icd9code) THEN DO;
    diseaseid=70;*depression;
    weight=1.29;
    END;
ELSE IF prxmatch("/^493/", icd9code) THEN DO;
    diseaseid=71;*asthma;
    weight=1.62;
    END;
ELSE IF prxmatch("/^49[0,1]^492\[0-8]^494\[0,1]^496|^518\[1-2]|^770\.2|^958\.7|^998\.81/", icd9code) THEN DO;
    diseaseid=72;*Chronic obstructive pulmonary disease (COPD) (chronic bronchitis and emphysema);
    weight=4.32;
    END;
ELSE IF prxmatch("/^595\[1-9]/", icd9code) THEN DO;
    diseaseid=74;*interstitial cystitis;
    weight=0.879;
    END;
ELSE IF prxmatch("/^592/", icd9code) THEN DO;
    diseaseid=75;*calculus of kidney and ureter;
    weight=0.291;
    END;
ELSE IF prxmatch("/^217/", icd9code) THEN DO;
    diseaseid=76;*benign breast disease;
    weight=0;
    END;
ELSE IF prxmatch("/^600/", icd9code) THEN DO;
    diseaseid=77;*benign prostatic hyperplasia (BPH);
    weight=0;
    END;
ELSE IF prxmatch("/^633/", icd9code) THEN DO;
    diseaseid=78;*ectopic pregnancy;
    weight=0;
    END;
ELSE IF prxmatch("/^617/", icd9code) THEN DO;
    diseaseid=79;*endometriosis;
    weight=0.142;
    END;
ELSE IF prxmatch("/^302\.72|^607\.84/", icd9code) THEN DO;*CHECKED;
    diseaseid=80;*erectile dysfunction;
    weight=1.22;
    END;
ELSE IF prxmatch("/^256\.4/", icd9code) THEN DO;

```

```

        diseaseid=81;*polycystic ovary syndrome;
        weight=0.64;
    END;
ELSE IF prxmatch("/^625\.4/", icd9code) THEN DO;
    diseaseid=82;*premenstrual syndrome;
    weight=0.412;
    END;
ELSE IF prxmatch("/^60\.2[1,9]|^60\.9[5,6,7]/", icd9code) THEN DO;
    diseaseid=83;*prostate surgery for benign prostatic
hyperplasia;
    weight=0;
    END;
ELSE IF prxmatch("/^218/", icd9code) THEN DO;
    diseaseid=84;*uterine fibroid;
    weight=0.029;
    END;
ELSE DO;
    diseaseid=85;*other non-mwi diagnosis;
    weight=0;
    END;
RUN;

PROC SORT DATA=&indata NODUPKEY;
    BY id diseaseid;
RUN;

DATA &indata;
    SET &indata;
    BY id;
    IF FIRST.id THEN num=0;
    num+1;
RUN;

PROC TRANSPOSE DATA=&indata OUT=&indata;
    BY id;
    ID num;
    VAR weight;
RUN;

DATA &outdata;
    SET &indata (RENAME=( _NAME_ =name));
    mwi=sum(of _:);
    KEEP id mwi;
RUN;

%mend;
```
